# Supplementary material for: Triple therapy in type 2 diabetes; a systematic review and network meta-analysis
Source: PeerJ. 2015 Dec 7;3:e1461. doi: 10.7717/peerj.1461 (PMC4675096; doi:10.7717/peerj.1461)
Supplement: Supplemental Information 1 [file peerj-03-1461-s001.xlsx]

## Sheet: HypoG
study	TotalN	dA	nA	dB	nB	dC	nC	dD	nD	dE	nE	dF	nF
Owens_2011	1055	39	263	180	792
Hermansen_2007	441	1	113	19	116	8	106
Dailey_2004	365	45	184					95	181
Kendall_2005	733	31	247							114	486
Russell_Jones_2009	581	19	115							46	232	68	234
Bergenstal_2009	372									36	124	145	248
Rosenstock_2006	216							47	112			57	104
Liu_2013	120			6	60			5	60
Lukashevich_2014	318	3	160	8	157
Moses_2014	257	8	128	13	129

## Sheet: HbA1c
study	TotalN	nA	bA	vA	nB	bB	vB	nC	bC	vC	nD	bD	vD	nE	bE	vE	nF	bF	vF	nG	bG	vG	nH	bH	vH	nI	bI	vI
Bergenstal_2009	372				124	-1.75	1.57	248	-2.55	1.66
Nauck_2007	501				248	-1.5	1.1	253	-1	0.95
Russell_Jones_2009	581	115	-0.24	1.18	232	-1.33	1.37	234	-1.09	1.38
Heine_2005	549				282	-1.11	1.25	267	-1.11	1.74
Rosenstock_2006	216							104	-1.66	1.7	112	-1.51	1.2
Dailey_2004	365	184	0.1	1.29							181	-0.9	1.43
Hermansen_2007	441	113	0.3	0.84										116	-0.59	0.82	106	-0.3	0.94
Kendall_2005	733	247	0.23	1.1	486	-0.66	1.18
Owens_2011	1055	263	-0.1	0.81										792	-0.72	0.84
Derosa_2013	453										225	-1.1	0.5							228	-0.7	0.2
Bosi_2011	803																			404	-0.88	0.8	399	-0.39	0.8
DeFronzo_2012	1168																			780	-1.4	0.99	388	-0.9	0.98
Schernthaner_2013	755													378	-0.92	0.55										377	-1.15	0.55
Liu_2013	120										59	-0.94	0.21	60	-0.71	0.21
Lukashevich_2014	318	160	-0.25	0.1										158	-1.01	0.09
Moses_2014	257	128	-0.08	0.08										129	-0.74	0.08
Wilding_2013	457	150	-0.13	0.08																						307	-0.95	0.05

## Sheet: BW
study	TotalN	nA	bA	vA	nB	bB	vB	nC	bC	vC	nD	bD	vD	nE	bE	vE	nF	bF	vF	nG	bG	vG	nH	bH	vH	nI	bI	vI
Bergenstal_2009	372				124	-1.9	0.34	248	3.45	0.23
Nauck_2007	501				248	-2.2	0.2	253	1.4	0.2
RussellJones_2009	581	115	-0.42	0.39	232	-1.8	0.33	234	1.6	0.33
Heine_2005	549				282	-2.3	0.21	267	1.8	0.19
Rosenstock_2006	216							104	1.7	0.4	112	3	0.4
Dailey_2004	365	184	0.03	0.23							181	3	0.27
Hermansen_2007	441	113	-0.7	0.33										116	0.4	0.26	106	1.1	0.33
Kendall_2005	733	247	-0.9	0.2	486	-1.6	0.2
Owens_2011	1055	263	-0.06	0.16										792	0.27	0.09
Derosa_2013	453										220	2.4	2.8							225	-1.5	2.1
DeFronzo_2012	1168																			780	1.85	0.14	388	1.5	0.2
Schernthaner_2013	755													378	0.3	0.2										377	-2.7	0.225
Liu_2013	120										60	1.34	0.32	60	-0.26	0.32
Lukashevich_2014	318	160	-0.1	0.2										158	0.5	0.2
Moses_2014	257	128	-0.6	0.19										129	0.2	0.19
Wilding_2013	457	150	-0.8	0.25																						307	-2.2	0.18
